# Supplementary figures and images for: XIAP impairs Smac release from the mitochondria during apoptosis
Source: PubMed Central journal article supplement — Cell Death Dis. 2010 Jun 3;1(6):e49–. doi: 10.1038/cddis.2010.26 (PMC3032314; doi:10.1038/cddis.2010.26), 2010-06-03

Supplemental Figure 2

**a**

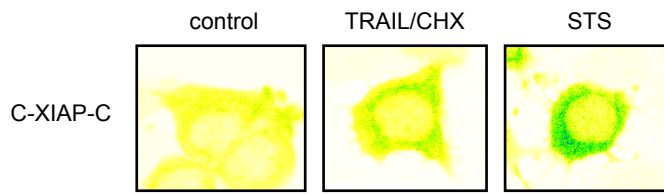

**b**

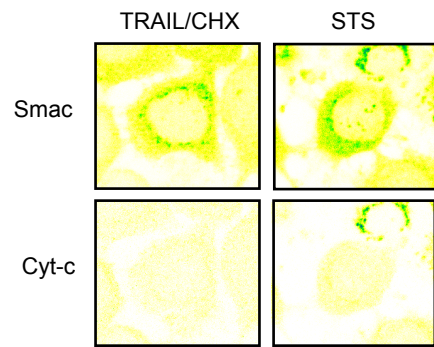

Supplement: cddis201026x2.pdf [file cddis201026x2.pdf]
